# Supplementary material for: GRB2 stabilizes RAD51 at reversed replication forks suppressing genomic instability and innate immunity against cancer
Source: Springer Nature journal article supplement (doi:10.1038/s41467-024-46283-y), 2024-03-08
Supplement: MOESM1 [file 41467_2024_46283_MOESM1_ESM.pdf]

# GRB2 stabilizes RAD51 at reversed replication forks suppressing genomic instability and innate immunity against cancer.

Zu Ye<sup>1</sup>, Shengfeng Xu<sup>2</sup>, Yin Shi<sup>3,4</sup>, Xueqian Cheng<sup>5</sup>, Yuan Zhang<sup>1</sup>, Sunetra Roy<sup>6</sup>, Sarita Namjoshi<sup>1</sup>, Michael A. Longo<sup>1</sup>, Todd M. Link<sup>1</sup>, Katharina Schlacher<sup>6</sup>, Guang Peng<sup>5</sup>, Dihua Yu<sup>1</sup>, Bin Wang<sup>3</sup>, John A. Tainer<sup>1\*</sup>, Zamal Ahmed<sup>1\*</sup>

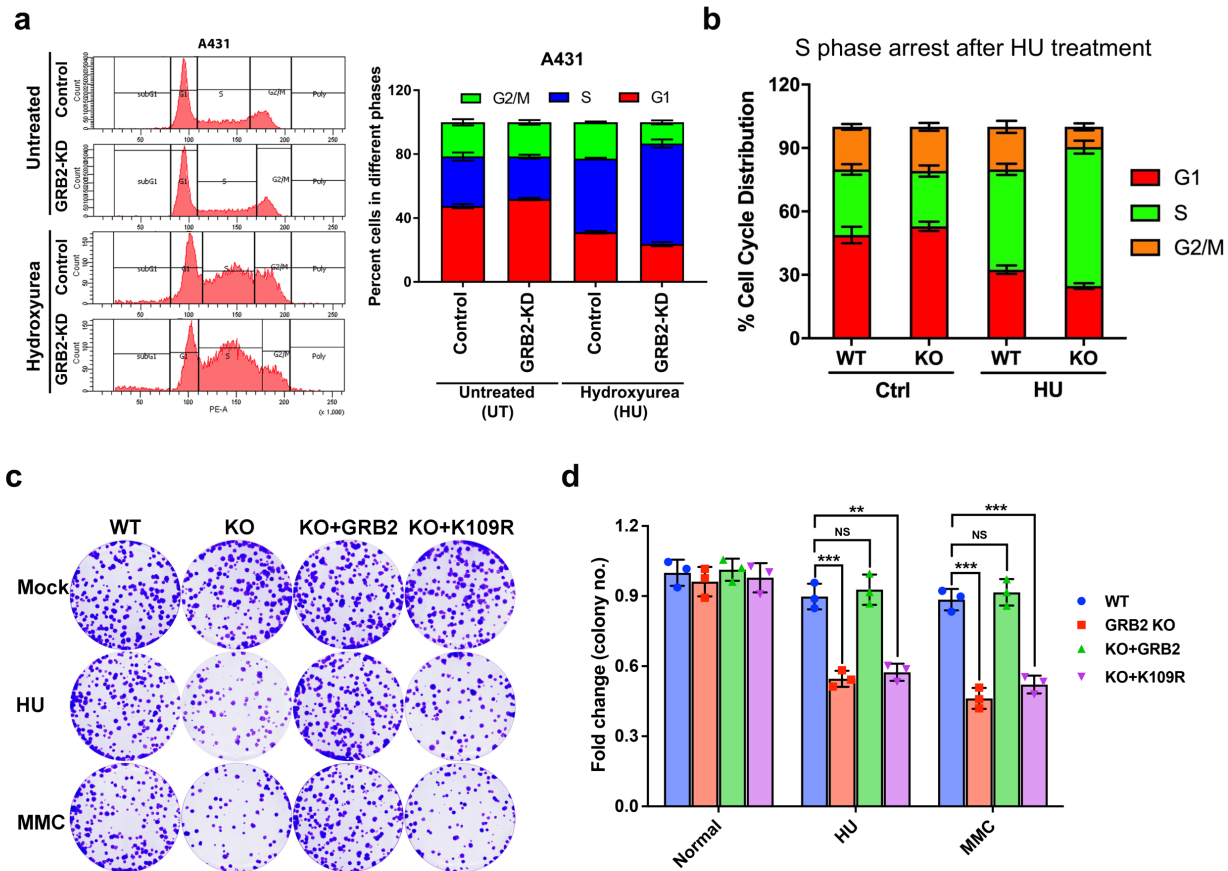

**Supplementary Fig. 1: GRB2 depleted cells are sensitive to DNA replication stress.**

**a**, Representative raw cell-cycle analysis data of propidium iodide stained A431 cells containing a scrambled shRNA (Control) or GRB2 shRNA (GRB2-KD). Cells were either left untreated or treated with 0.5mM hydroxyurea (HU) for 24h. Quantitation are shown on the right. **b**, Quantitation of control (Ctrl) and GRB2-KO HeLa cells at different stage of cell-cycle following 24h 0.5mM hydroxyurea treatment. Both GRB2-KD A431 and GRB2-KO HeLa cells showing higher percentage of cell stagnation at S-phase following HU treatment. **c**, Colony survival assay of HeLa cells treated with a single dose 0.5mM HU or 0.1mM mitomycin C. 10 day after treatment cells were stained with trypan blue imaged with densitometer. **d**, Quantitation of colony survival assay data from three independent

experiments. The significance was analyzed by two-sided Student's t test. \*\*\* $P \leq 0.001$  and NS, not significant. Error bars showing standard deviations (SD).

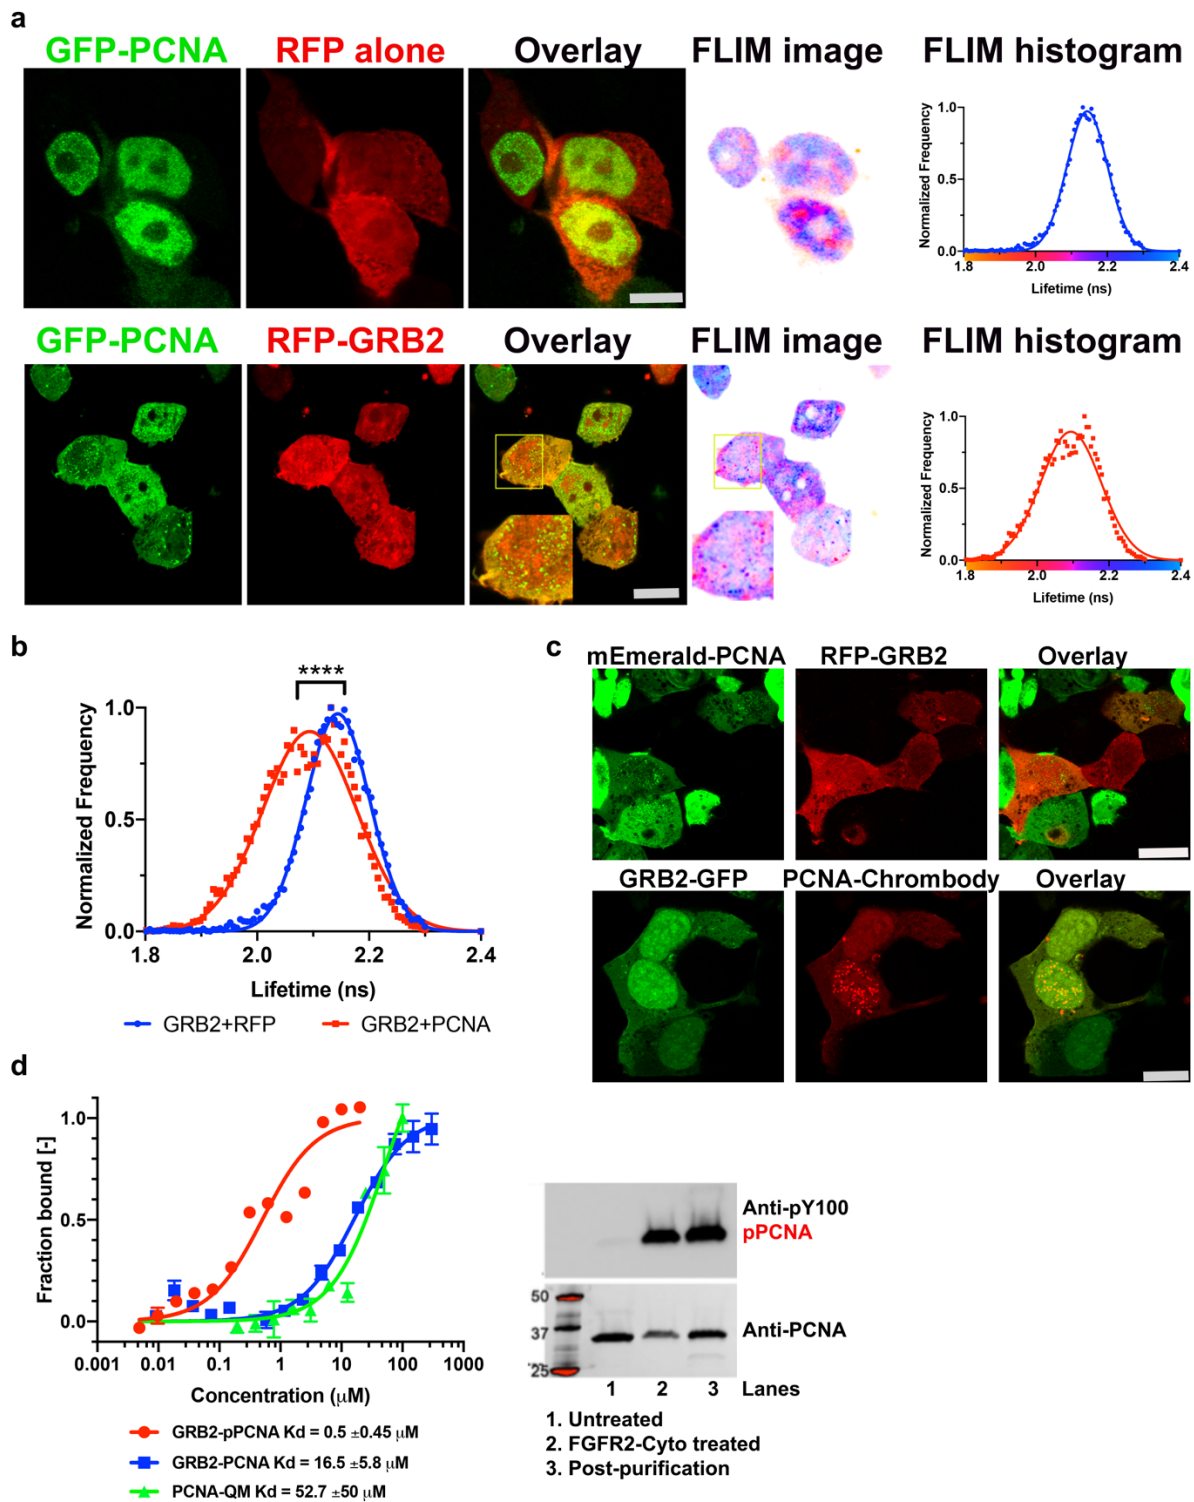

**Supplementary Fig. 2: Measurements of GRB2-PCNA direct interactions.**

**a**, Fluorescence lifetime imaging microscopy (FLIM) (1) measuring fluorescence resonance energy transfer (FRET) from GFP-PCNA to RFP-GRB2. Individual along with colocalized images are shown.

The lifetime image shown as a false color image generated by pixel-by-pixel mapping of the measured lifetime-values represented by the scale 1.8-2.4 nanosecond (ns). The FLIM histograms showing normalized frequency distribution of lifetime for the field of view image. Scale bar 25 $\mu$ m. **b**, Overlay of the two FLIM histogram to demonstrate a left-shifted distribution of lifetime for sample containing donor (GFP-PCNA) and acceptor (RFP-GRB2) as binding partner. Raw data was fitted in Prism 8 with Gaussian fitting parameter. Two-way ANOVA test,  $P = 0.0001$ . **c**, Confocal imaging of PCNA overexpression. Co-localization of monomeric Emerald (mEmerald) tagged PCNA without the nuclear localization (NLS) sequence and n-terminal RFP-tagged GRB2 (RFP-GRB2) showing diffused distributions with nuclear PCNA-foci (top panels). Co-overexpression of TagRFP-tagged PCNA chromobody and c-terminal GFP-tagged GRB2. Scale bar 25 $\mu$ m. **d**, MST binding isotherms measuring 100nM Atto488 labelled GRB2 interaction with titrating concentration of PCNA (GRB2-PCNA). 100nM Atto488 labelled PCNA mixed with titrating concentration of GASHGQTGMFPRNYVT peptide. the resulting binding isotherm and  $K_d$  ( $\mu$ M) is shown (PCNA-QM). Also shown titrating concentration of tyrosine phosphorylated PCNA interaction with fixed 100nM Atto488 labelled GRB2 (GRB2-pPCNA). **e**, Western analysis for the tyrosine phosphorylated PCNA used for MST binding studies in 'c'. Bacterially purified 100nM FGFR2 cytoplasmic domain as described previously (2) and 1mg PCNA was mixed in the presence of ATP/Mg<sup>2+</sup> for 4 hours then run through an SEC column. Phosphorylated PCNA fraction then isolated using Phosphoprotein purification column (Takara).

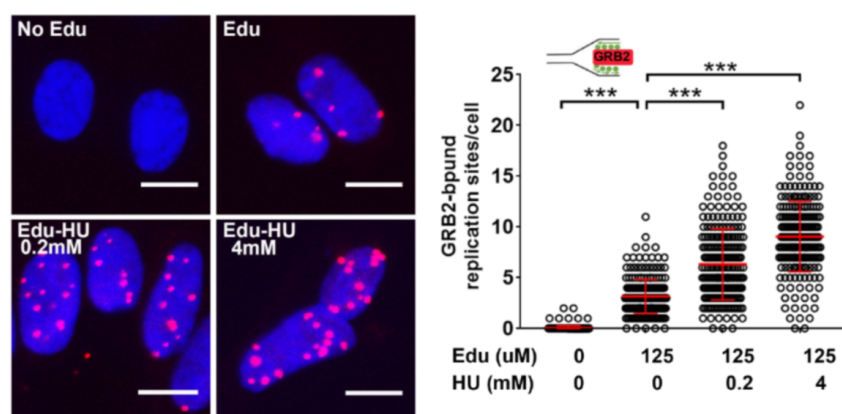

**Supplementary Fig. 3:** In situ analysis of protein interactions at DNA replication forks (SIRF) assay (3) showing hydroxyurea (HU) mediated replication stress induced GRB2 accumulation at replication sites. The significance was analyzed by two-sided Student's t-test. \*\*\* $P \leq 0.001$  and NS, not significant. Error bars showing standard deviations (SD). Scale bar 10 $\mu$ m.

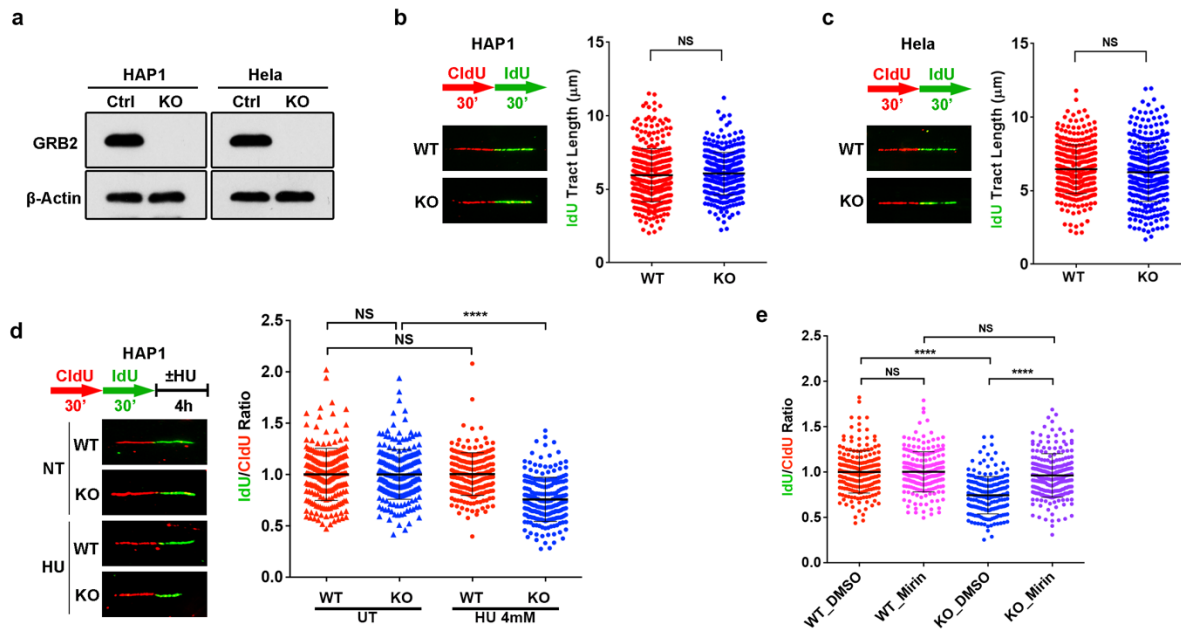

**Supplementary Fig. 4: Replication forks of GRB2-depleted cells are susceptible to MRE11 dependent degradation.**

**a**, Western blot analysis of total cellular protein from control and GRB2 knockout HeLa and HAP-1 cells. Anti-beta actin antibody was used as loading control. **b-c**, DNA fiber assay showing a comparison of DNA replication fork between control and GRB2 KO HeLa and HAP-1 cells under normal media growth condition. **d**, DNA fiber assay showing enhanced fork degradation in GRB2-depleted HAP-1 cells under replication stress. **e**, Fork degradation is inhibited by MRE11 nuclease inhibitor Mirin in HAP1 cells lacking GRB2 and under replication stress. (The significance was analyzed by two-sided Student's t test. \*\*\* $P \leq 0.001$ , and \*\*\*\* $P \leq 0.0001$ ; NS, not significant).

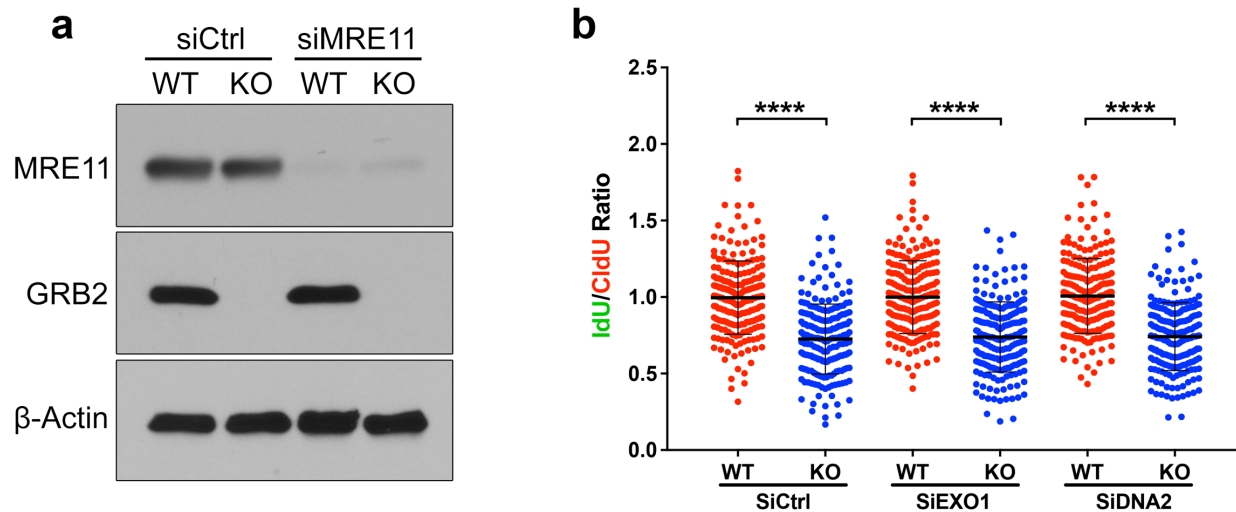

**Supplementary Fig. 5: MRE11 specifically degrade RFs in GRB2 depleted cells.** **a**, western analysis of MRE11-knockdown (siMRE11) in control and GRB2-KO HeLa cells. **b**, The knockdown of EXO1 or DNA2 failed to prevent fork degradation in GRB2-depleted HeLa cells under replication stress. The significance was analyzed by two-sided Student's t test. \*\*\* $P \leq 0.001$ .

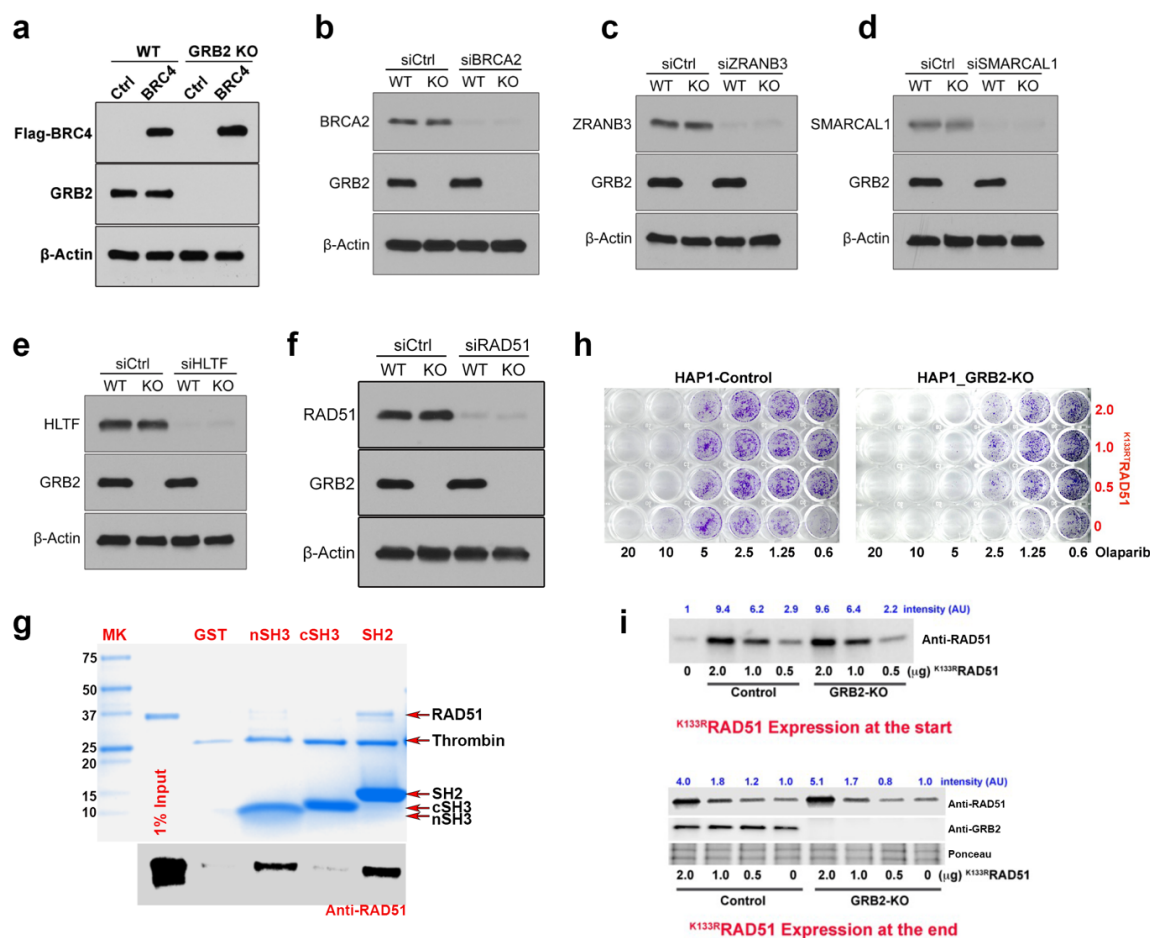

**Supplementary Fig. 6: Western analysis for protein knockdowns plus the functional effect of  $K^{133R}$ RAD51 expression on PARPi mediated GRB2-KO cell-killing.**

**a-f**, Western blotting analysis validating siRNA mediated knockdown of the designated proteins with the indicated antibody. Anti-GRB2 and anti-beta actin was also used to confirm GRB2-KO and loading control respectively.

**g**, An *in vitro* pulldown assay and Coomassie blue detection showing GRB2-SH2 domain specifically binds RAD51. Thrombin cleavage was used to elute SH-domain from the GSH agarose beads. The position of RAD51, thrombin and the individual SH-domains are shown with arrows. A parallel gel was immunoblotted with anti-RAD51 antibody confirming GRB2-SH2 domain as the primary interaction site.

The sensitivity of western analysis also suggests the nSH3 domain specifically is also capable of making a contact with RAD51. **h**, Colony survival PARPi dose-response assay of control and GRB2-KO cells transfected with increasing concentrations of K133R mutant RAD51 ( $K^{133R}$ RAD51). Cells were treated with indicated concentration of Olaparib for 8 consecutive days before visualization with trypan blue staining. **i**, Western analysis of  $K^{133R}$ RAD51 expression at the start (top panel) and on the final day-8 of the clonogenic assay (bottom panels). The relative expression quantification of intensity adjusted to un-transfected (0) are shown as arbitrary unit (AU).



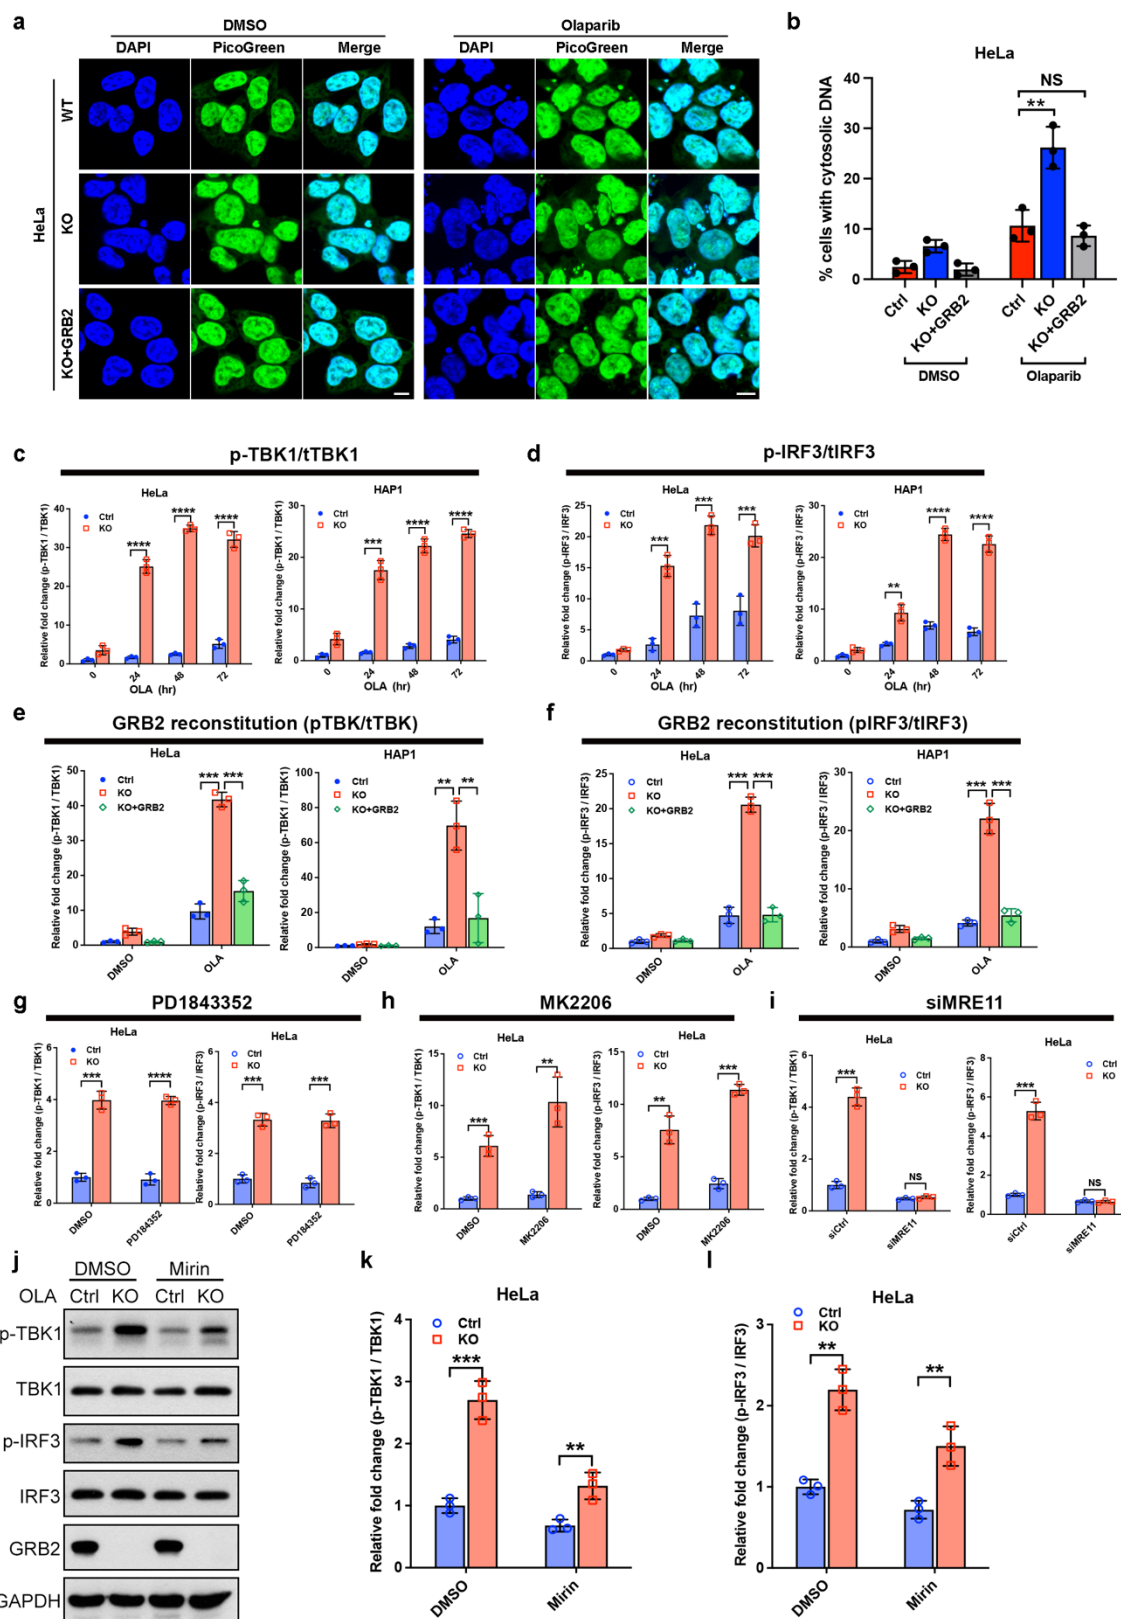



**Supplementary Fig. 7: PARPi induced micronuclei formation in GRB2 depleted HeLa cells.** **a**, Representative PicoGreen and DAPI staining showing Olaparib-induced cytoplasmic micronuclei formation in HeLa cells. Scale bar 10 $\mu$ m. **b**, Quantitation of cytoplasmic micronuclei from three independent experiments are shown in the left panel. **c-i**, Quantitation of pTBK1 and IRF3 levels in three independent western blotting data from HeLa and HAP1 cells. **j-i**, The effect of MRE11 inhibitors Mirin on pTBK1 level in control and GRB2-KO cells. HeLa cells treated with 10 $\mu$ M Olaparib and with or without 10 $\mu$ M Mirin for 48h. Total cell lysates were immunoblotted for the indicated antibody. **j**; representative western blot, **k**; quantification of pTBK1/totalTBK1 from three independent experiments, **l**; quantification of pIRF3/totalIRF3 from three independent experiments. The significance was analyzed by two-sided Student's t test. \*\*P  $\leq$  0.01; \*\*\*P  $\leq$  0.001; \*\*\*\*P  $\leq$  0.0001; NS, not significant.

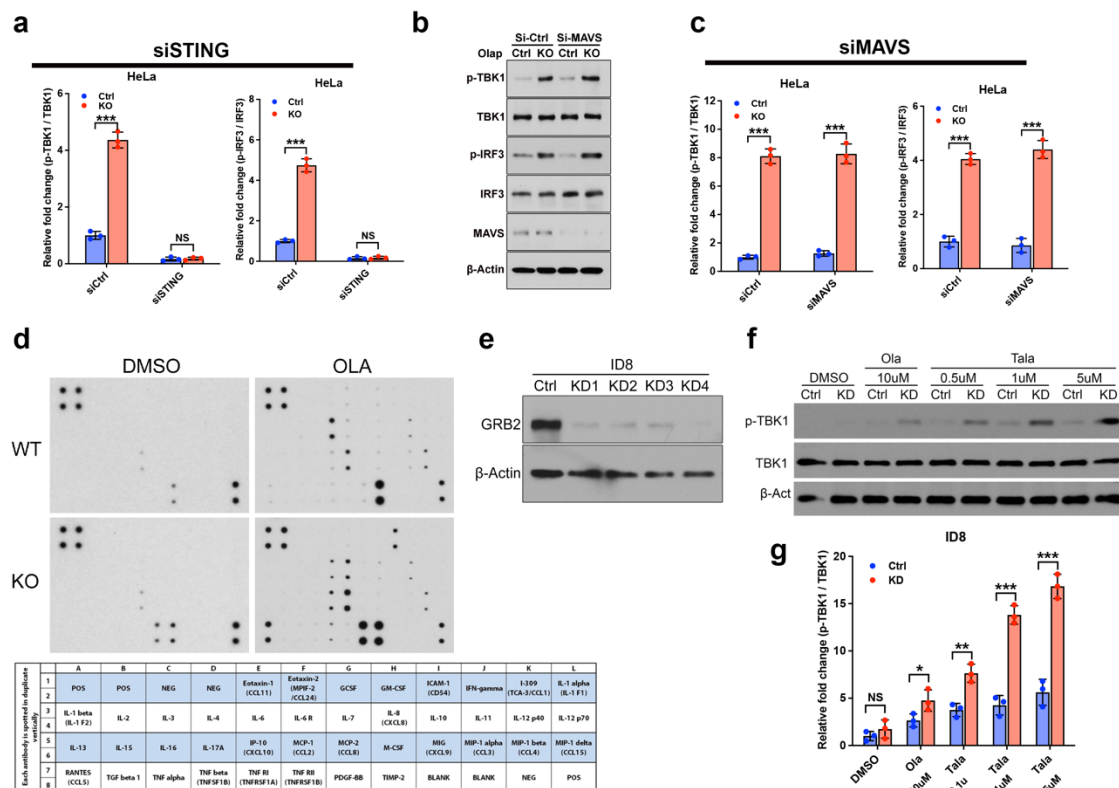

# Supplementary Fig. 8: MAVS pathway is not involved in GRB2-KO cells.

**a**, Quantification of pTBK1 and pIRF3 phosphorylation levels in the control and GRB2-KO HeLa cells. Data from three independent experiments are shown. **b**, representative western blot of the effect of Olaparib treatment (10 $\mu$ M for 48h) on TBK-1 and IRF-3 phosphorylation in GRB2-KO HeLa cells depleted of MAVS. MAVS was knocked down in control and GRB2-KO HeLa cells with siRNA, and olaparib induced pTBK1 and pIRF3 were measured. **c**, western blot quantification from three independent experiments. \*\*\*P  $\leq$  0.001; NS, not significant. **d**, Representative image of a cytokine array slide. Control and GRB2-KO HeLa cells untreated or treated with 10  $\mu$ M Olaparib for 48h then the supernatants were analyzed for pro-inflammatory cytokines in cell-media. Tested cytokines with their relative grid positions are shown below. **e**, Knockdown (KD) efficiency of mouse Ovarian cancer cells ID8 evaluated with anti-GRB2 antibody and anti-beta actin as loading control. GRB2 expression level in KD clones 1-4 are shown. The clone KD4 showed the most GRB2 depletion. **f**, Testing of PARPi Olaparib and Talazoparib responses by mouse ID8 clone-KD4. Anti-pTBK1 antibody was used to evaluate cGAS/STING activation. Total TBK1 and beta actin were used as loading controls. Cells were treated for 48h by the indicated inhibitor concentration of PARPi **g**, Quantification of Olaparib induced pTBK1 level in ID8 cells from three independent experiments. The significance was analyzed by two-sided Student's t test. \*\*P  $\leq$  0.01; \*\*\*P  $\leq$  0.001; \*\*\*\*P  $\leq$  0.0001; NS, not significant.

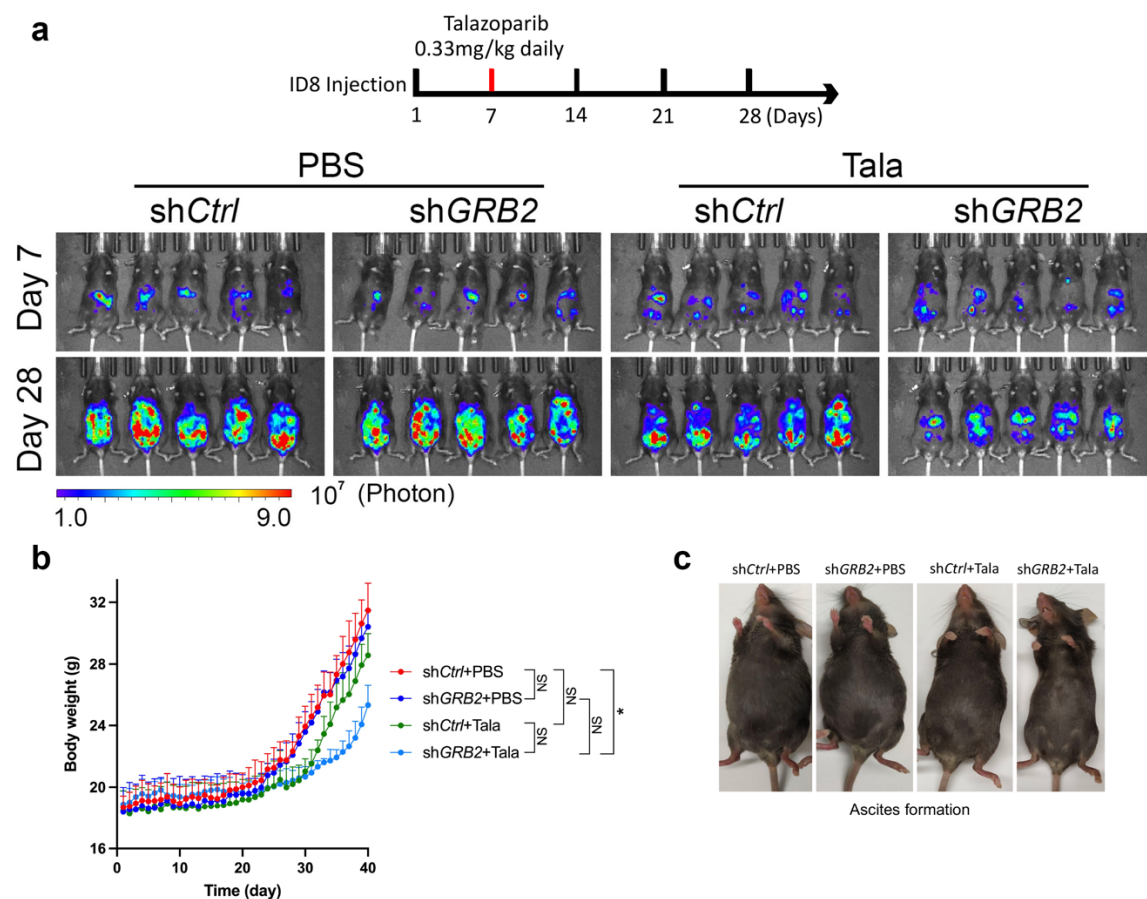

**Supplementary Fig. 9: Luciferase imaging and ascites.**

**a**, in vivo mouse study to evaluate the effect of PARPi treatment in cells expressing low-level GRB2. Luciferase imaging of mice at day 7 and day 28 are shown. **b**, the body weight measurements of all treated animals. **c**, representative images of mouse with apparent high body weight due to increased ascites fluid accumulation.

### **Supplementary References:**

1. Ahmed Z, Timsah Z, Suen KM, Cook NP, Lee GRt, Lin CC, Gagea M, Marti AA, Ladbury JE. Grb2 monomer-dimer equilibrium determines normal versus oncogenic function. *Nat Commun.* 2015;6:7354. Epub 2015/06/25. doi: 10.1038/ncomms8354. PubMed PMID: 26103942; PMCID: PMC4491180.
2. Lin CC, Melo FA, Ghosh R, Suen KM, Stagg LJ, Kirkpatrick J, Arold ST, Ahmed Z, Ladbury JE. Inhibition of basal FGF receptor signaling by dimeric Grb2. *Cell.* 2012;149(7):1514-24. doi: 10.1016/j.cell.2012.04.033. PubMed PMID: 22726438.
3. Roy S, Luzwick JW, Schlacher K. SIRF: Quantitative in situ analysis of protein interactions at DNA replication forks. *J Cell Biol.* 2018;217(4):1521-36. Epub 2018/02/25. doi: 10.1083/jcb.201709121. PubMed PMID: 29475976; PMCID: PMC5881507.
